# Supplementary material for: Tracking cellular uptake, intracellular trafficking and fate of nanoclay particles in human bone marrow stromal cells
Source: Royal Society of Chemistry journal article supplement (doi:10.1039/d3nr02447d), 2023-01-01
Supplement: d3nr02447d2.pdf [file d3nr02447d2.pdf]

SUPPLEMENTARY

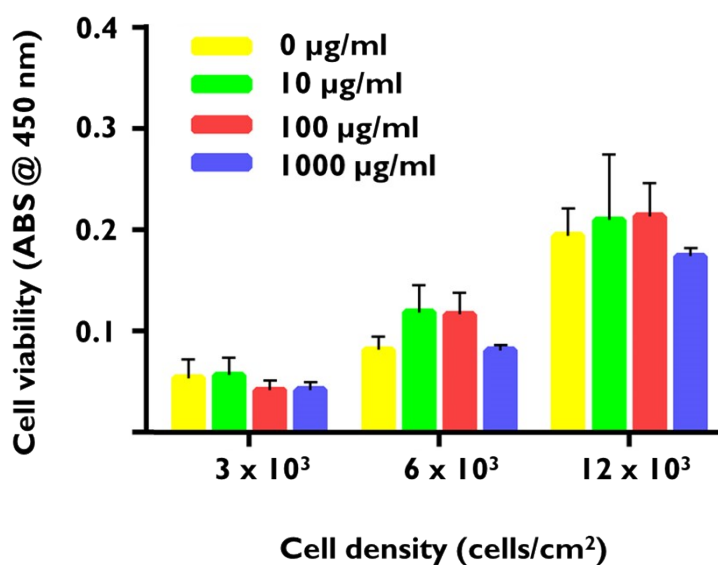

**Figure S1: Laponite nanoparticles do not interfere in the WST1 absorbance readout at 450nm.** Cells were incubated at 37C for 24 hours then Laponite was added directly to cell media supernatants prior to absorbance measurement at 450 nm.

| <i>Clay Conc.<br/>(<math>\mu\text{g/mL}</math>)</i> | <i>Calculated Conc.<br/>(<math>\mu\text{g/mL}</math>)</i> |            | <i>Measured Conc. (<math>\mu\text{g/mL}</math>)</i> |               |
|-----------------------------------------------------|-----------------------------------------------------------|------------|-----------------------------------------------------|---------------|
|                                                     | <i>Li</i>                                                 | <i>Si</i>  | <i>Li</i>                                           | <i>Si</i>     |
| <i>0</i>                                            | <i>0</i>                                                  | <i>0</i>   | <i>0</i>                                            | <i>0</i>      |
| <i>5</i>                                            | <i>0.0135</i>                                             | <i>1.5</i> | <i>0.007714</i>                                     | <i>0.551</i>  |
| <i>10</i>                                           | <i>0.027</i>                                              | <i>3</i>   | <i>0.018824</i>                                     | <i>1.448</i>  |
| <i>25</i>                                           | <i>0.0675</i>                                             | <i>7.5</i> | <i>0.052762</i>                                     | <i>3.9215</i> |
| <i>50</i>                                           | <i>0.135</i>                                              | <i>15</i>  | <i>0.1083</i>                                       | <i>7.942</i>  |
| <i>100</i>                                          | <i>0.27</i>                                               | <i>30</i>  | <i>0.17712</i>                                      | <i>8.528</i>  |

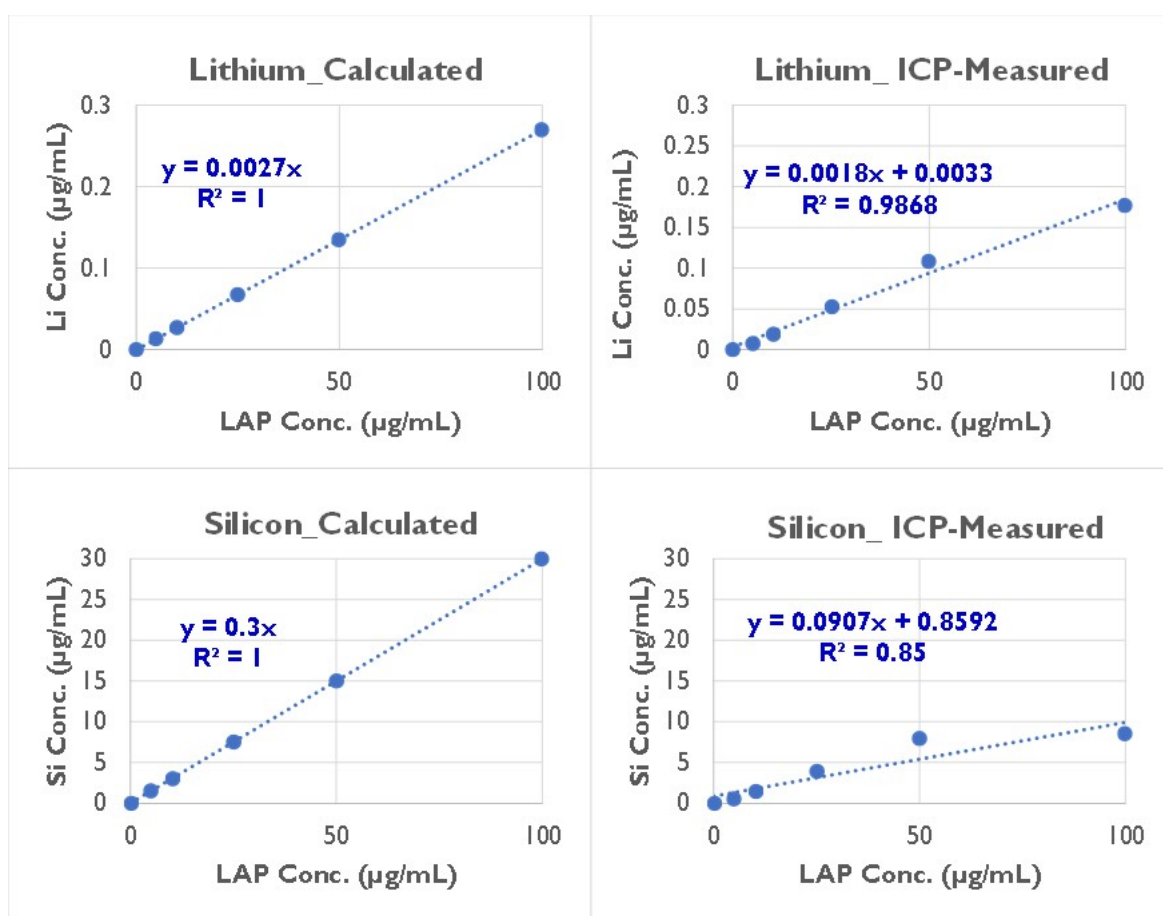

**Figure S2: Silicon vs Lithium as a biomarker element for LAPONITE quantification by ICPMS.** (A) table comparing theoretical vs measured Si & Li concentrations corresponding to LAPONITE doses 0-100  $\mu\text{g/mL}$ . (B) Lithium showed a higher degree of correlation and ICP-measured values close to the expected/theoretical ones.

Refer to separate video file

**Figure S3: Laponite nanoparticles are endocytosed by hBMSCs as confirmed by cell mask deep red stain.** Cells were incubated with RB-labelled Laponite for 24 hours then imaged with confocal microscopy using DAPI (blue channel) and cell mask deep red (red channel) for visualising nucleus and cell membrane respectively.
