# Supplementary figures and images for: Tracking cellular uptake, intracellular trafficking and fate of nanoclay particles in human bone marrow stromal cells
Source: Royal Society of Chemistry journal article supplement (doi:10.1039/d3nr02447d), 2023-01-01

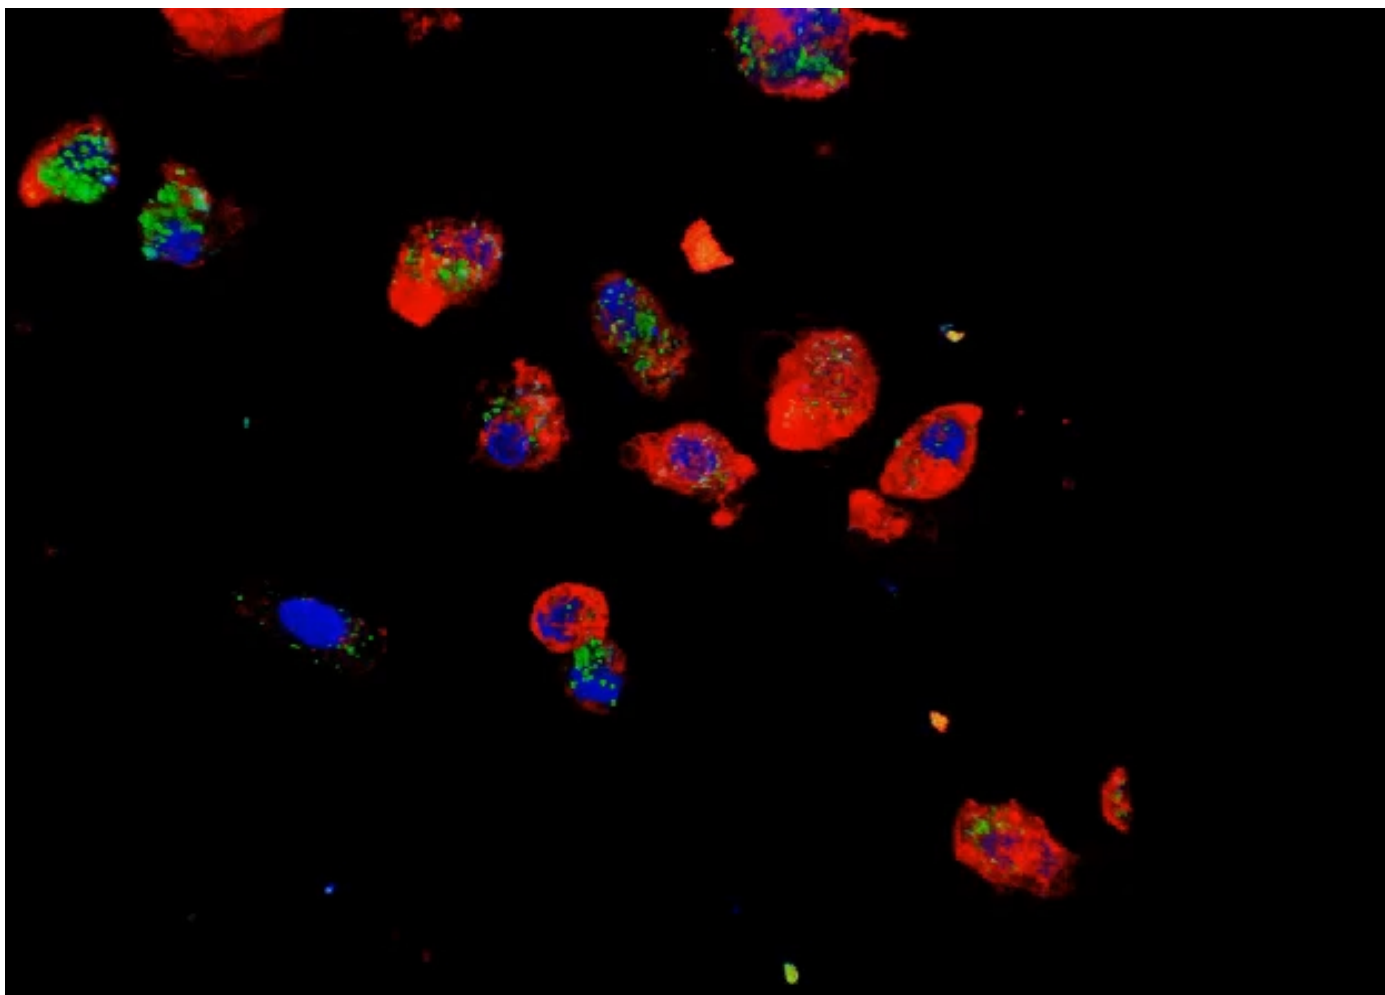

Supplement: d3nr02447d3.pdf [file d3nr02447d3.pdf]
